# Supplementary material for: Acid catalyzed coupling of aromatic aldehydes and methyldiazoacetate––a theoretical mechanistic study
Source: Royal Society of Chemistry journal article supplement (doi:10.1039/c2nj20824e), 2012-01-01
Supplement: c2nj20824e.pdf [file c2nj20824e.pdf]

# Acid Catalyzed Coupling of Aromatic Aldehydes and Methyl diazoacetate – A Theoretical Mechanistic Study

Georg Dazinger and Karl A. Kirchner\*

## Supporting Information

### A<sup>Z</sup>

total electronic energy  $E_{\text{tot}} = -345.925271823$  (Hartree/Particle)  
Zero-point correction= 0.123526  
Thermal correction to Energy= 0.130003  
Thermal correction to Enthalpy= 0.130947  
Thermal correction to Gibbs Free Energy= 0.092917  
Sum of electronic and zero-point Energies= -345.801746  
Sum of electronic and thermal Energies= -345.795269  
Sum of electronic and thermal Enthalpies= -345.794325  
Sum of electronic and thermal Free Energies= -345.832355

|       |        |        |        |
|-------|--------|--------|--------|
| O(1)  | -2.578 | -0.384 | -0.001 |
| C(2)  | -1.675 | 0.550  | -0.000 |
| C(3)  | -0.309 | 0.245  | -0.000 |
| C(4)  | 0.163  | -1.101 | -0.000 |
| C(5)  | 0.613  | 1.332  | -0.000 |
| C(6)  | 1.522  | -1.337 | -0.000 |
| C(7)  | 1.971  | 1.075  | -0.000 |
| C(8)  | 2.421  | -0.254 | -0.000 |
| H(9)  | -3.489 | -0.043 | 0.001  |
| H(10) | -2.009 | 1.588  | -0.000 |
| H(11) | -0.548 | -1.920 | -0.000 |
| H(12) | 0.244  | 2.353  | -0.000 |
| H(13) | 1.900  | -2.353 | -0.000 |
| H(14) | 2.684  | 1.891  | -0.000 |
| H(15) | 3.489  | -0.453 | -0.000 |

### A<sup>E</sup>

total electronic energy  $E_{\text{tot}} = -345.921409717$  (Hartree/Particle)  
Zero-point correction= 0.123342  
Thermal correction to Energy= 0.129882  
Thermal correction to Enthalpy= 0.130826  
Thermal correction to Gibbs Free Energy= 0.092573  
Sum of electronic and zero-point Energies= -345.798068  
Sum of electronic and thermal Energies= -345.791528  
Sum of electronic and thermal Enthalpies= -345.790584  
Sum of electronic and thermal Free Energies= -345.828836

|       |        |        |        |
|-------|--------|--------|--------|
| O(1)  | 3.095  | 0.248  | 0.000  |
| C(2)  | 2.086  | -0.558 | -0.000 |
| C(3)  | 0.716  | -0.234 | -0.000 |
| C(4)  | 0.226  | 1.103  | -0.000 |
| C(5)  | -0.199 | -1.325 | 0.000  |
| C(6)  | -1.135 | 1.329  | 0.000  |
| C(7)  | -1.562 | -1.082 | 0.000  |
| C(8)  | -2.026 | 0.239  | 0.000  |
| H(9)  | 2.859  | 1.194  | 0.000  |
| H(10) | 2.403  | -1.600 | 0.000  |
| H(11) | 0.901  | 1.955  | -0.000 |
| H(12) | 0.179  | -2.343 | 0.000  |
| H(13) | -1.521 | 2.343  | 0.000  |
| H(14) | -2.265 | -1.908 | 0.000  |
| H(15) | -3.095 | 0.429  | 0.000  |

## **A<sup>Z</sup>-A<sup>E</sup> interconversion**

total electronic energy  $E_{\text{tot}} = -345.899641131$  (Hartree/Particle)  
Zero-point correction= 0.121017  
Thermal correction to Energy= 0.127408  
Thermal correction to Enthalpy= 0.128352  
Thermal correction to Gibbs Free Energy= 0.090428  
Sum of electronic and zero-point Energies= -345.778624  
Sum of electronic and thermal Energies= -345.772234  
Sum of electronic and thermal Enthalpies= -345.771289  
Sum of electronic and thermal Free Energies= -345.809213

|       |         |         |         |
|-------|---------|---------|---------|
| O(1)  | 2.8069  | 0.3247  | -0.0695 |
| C(2)  | 1.8389  | -0.5651 | -0.0115 |
| C(3)  | 0.4847  | -0.2451 | -0.0121 |
| C(4)  | 0.0304  | 1.1121  | -0.0218 |
| C(5)  | -0.4606 | -1.3201 | -0.0002 |
| C(6)  | -1.3227 | 1.3715  | -0.0073 |
| C(7)  | -1.8123 | -1.0403 | 0.0188  |
| C(8)  | -2.2382 | 0.2994  | 0.0153  |
| H(9)  | 3.1543  | 0.7056  | 0.7527  |
| H(10) | 2.1505  | -1.6129 | -0.0583 |
| H(11) | 0.7571  | 1.9162  | -0.0603 |
| H(12) | -0.1052 | -2.3464 | -0.0012 |
| H(13) | -1.6879 | 2.3924  | -0.0205 |
| H(14) | -2.5417 | -1.8423 | 0.0317  |
| H(15) | -3.3029 | 0.5153  | 0.0240  |

## **MDA**

total electronic energy  $E_{\text{tot}} = -376.630066839$  (Hartree/Particle)  
Zero-point correction= 0.076766  
Thermal correction to Energy= 0.084016  
Thermal correction to Enthalpy= 0.084960  
Thermal correction to Gibbs Free Energy= 0.044972  
Sum of electronic and zero-point Energies= -376.553301  
Sum of electronic and thermal Energies= -376.546051  
Sum of electronic and thermal Enthalpies= -376.545106  
Sum of electronic and thermal Free Energies= -376.585095

|       |        |        |        |
|-------|--------|--------|--------|
| C(1)  | -0.942 | 1.042  | -0.000 |
| N(2)  | -1.834 | 0.087  | -0.001 |
| N(3)  | -2.610 | -0.745 | 0.001  |
| C(4)  | 2.107  | -0.970 | -0.000 |
| O(5)  | 1.352  | 1.590  | 0.000  |
| C(6)  | 0.485  | 0.739  | -0.000 |
| O(7)  | 0.719  | -0.598 | -0.000 |
| H(8)  | -1.302 | 2.059  | -0.001 |
| H(9)  | 2.116  | -2.059 | -0.001 |
| H(10) | 2.610  | -0.582 | 0.889  |
| H(11) | 2.610  | -0.582 | -0.889 |

## **A<sub>1</sub><sup>Z</sup>**

total electronic energy  $E_{\text{tot}} = -722.579729636$  (Hartree/Particle)  
Zero-point correction= 0.201407  
Thermal correction to Energy= 0.217243  
Thermal correction to Enthalpy= 0.218187  
Thermal correction to Gibbs Free Energy= 0.153231  
Sum of electronic and zero-point Energies= -722.378323  
Sum of electronic and thermal Energies= -722.362487  
Sum of electronic and thermal Enthalpies= -722.361543  
Sum of electronic and thermal Free Energies= -722.426498

|       |        |         |         |
|-------|--------|---------|---------|
| O(1)  | 1.8191 | 2.6223  | 0.8275  |
| C(2)  | 1.4652 | 1.4344  | 0.4318  |
| C(3)  | 2.4336 | 0.4883  | 0.0576  |
| C(4)  | 3.8281 | 0.7727  | 0.0716  |
| C(5)  | 1.9597 | -0.7916 | -0.3445 |
| C(6)  | 4.7188 | -0.2095 | -0.3141 |
| C(7)  | 2.8697 | -1.7637 | -0.7269 |
| C(8)  | 4.2398 | -1.4715 | -0.7119 |
| H(9)  | 1.0557 | 3.1773  | 1.0615  |
| H(10) | 0.3995 | 1.1790  | 0.3900  |
| H(11) | 4.1751 | 1.7525  | 0.3807  |
| H(12) | 0.8908 | -0.9844 | -0.3352 |
| H(13) | 5.7852 | -0.0125 | -0.3120 |

|       |         |         |         |
|-------|---------|---------|---------|
| H(14) | 2.5267  | -2.7448 | -1.0359 |
| H(15) | 4.9501  | -2.2358 | -1.0132 |
| C(16) | -3.1671 | 0.7949  | -0.7814 |
| N(17) | -4.4544 | 0.5887  | -0.9635 |
| N(18) | -5.5616 | 0.4090  | -1.1158 |
| C(19) | -2.5040 | -1.8876 | 1.6117  |
| O(20) | -1.2113 | 0.0981  | 0.3389  |
| C(21) | -2.4159 | -0.0485 | 0.1162  |
| O(22) | -3.1634 | -1.0068 | 0.6811  |
| H(23) | -2.7177 | 1.6010  | -1.3407 |
| H(24) | -3.2894 | -2.5327 | 2.0012  |
| H(25) | -2.0415 | -1.3158 | 2.4184  |
| H(26) | -1.7440 | -2.4826 | 1.1001  |

### **A<sub>1</sub><sup>E</sup>**

-722.576185079 (Hartree/Particle)

|                                              |             |
|----------------------------------------------|-------------|
| Zero-point correction=                       | 0.201325    |
| Thermal correction to Energy=                | 0.217115    |
| Thermal correction to Enthalpy=              | 0.218059    |
| Thermal correction to Gibbs Free Energy=     | 0.153382    |
| Sum of electronic and zero-point Energies=   | -722.374860 |
| Sum of electronic and thermal Energies=      | -722.359071 |
| Sum of electronic and thermal Enthalpies=    | -722.358126 |
| Sum of electronic and thermal Free Energies= | -722.422803 |

|       |         |         |         |
|-------|---------|---------|---------|
| O(1)  | -1.4764 | -2.8178 | 0.0002  |
| C(2)  | -1.3559 | -1.5280 | 0.0002  |
| C(3)  | -2.4043 | -0.5817 | 0.0000  |
| C(4)  | -3.7840 | -0.9265 | 0.0001  |
| C(5)  | -2.0095 | 0.7842  | -0.0002 |
| C(6)  | -4.7356 | 0.0735  | -0.0000 |
| C(7)  | -2.9792 | 1.7765  | -0.0003 |
| C(8)  | -4.3322 | 1.4224  | -0.0003 |
| H(9)  | -2.3995 | -3.1308 | 0.0002  |
| H(10) | -0.3129 | -1.1896 | 0.0002  |
| H(11) | -4.1116 | -1.9635 | 0.0003  |
| H(12) | -0.9491 | 1.0214  | -0.0002 |
| H(13) | -5.7909 | -0.1755 | 0.0000  |
| H(14) | -2.6910 | 2.8218  | -0.0005 |
| H(15) | -5.0894 | 2.2006  | -0.0004 |
| C(16) | 3.2413  | -1.0008 | -0.0002 |
| N(17) | 4.5506  | -0.8683 | -0.0002 |
| N(18) | 5.6766  | -0.7510 | -0.0004 |
| C(19) | 2.3334  | 2.5392  | 0.0004  |
| O(20) | 1.1621  | 0.1118  | 0.0002  |
| C(21) | 2.3945  | 0.1667  | 0.0001  |
| O(22) | 3.0886  | 1.3139  | 0.0002  |
| H(23) | 2.8522  | -2.0074 | -0.0002 |
| H(24) | 3.0769  | 3.3343  | 0.0006  |
| H(25) | 1.7093  | 2.6034  | 0.8947  |
| H(26) | 1.7094  | 2.6038  | -0.8939 |

### **A<sub>2</sub><sup>Z</sup>**

total electronic energy E<sub>tot</sub> = -722.580393738 (Hartree/Particle)

|                                              |             |
|----------------------------------------------|-------------|
| Zero-point correction=                       | 0.200142    |
| Thermal correction to Energy=                | 0.215708    |
| Thermal correction to Enthalpy=              | 0.216652    |
| Thermal correction to Gibbs Free Energy=     | 0.152906    |
| Sum of electronic and zero-point Energies=   | -722.380252 |
| Sum of electronic and thermal Energies=      | -722.364686 |
| Sum of electronic and thermal Enthalpies=    | -722.363741 |
| Sum of electronic and thermal Free Energies= | -722.427488 |

|       |        |        |        |
|-------|--------|--------|--------|
| O(1)  | -0.590 | -0.427 | -0.910 |
| C(2)  | 0.128  | -0.183 | 0.120  |
| C(3)  | 1.501  | 0.139  | 0.034  |
| C(4)  | 2.173  | 0.202  | -1.216 |
| C(5)  | 2.204  | 0.397  | 1.239  |
| C(6)  | 3.519  | 0.518  | -1.245 |
| C(7)  | 3.552  | 0.713  | 1.194  |
| C(8)  | 4.204  | 0.773  | -0.045 |
| H(9)  | -1.579 | -0.660 | -0.683 |
| H(10) | -0.351 | -0.229 | 1.103  |
| H(11) | 1.624  | 0.001  | -2.129 |
| H(12) | 1.683  | 0.346  | 2.191  |

|       |        |        |        |
|-------|--------|--------|--------|
| H(13) | 4.047  | 0.569  | -2.191 |
| H(14) | 4.099  | 0.912  | 2.108  |
| H(15) | 5.261  | 1.020  | -0.079 |
| C(16) | -3.678 | 1.195  | -0.536 |
| N(17) | -4.530 | 2.162  | -0.258 |
| N(18) | -5.261 | 2.986  | -0.005 |
| C(19) | -3.249 | -2.414 | -0.008 |
| O(20) | -4.918 | -0.450 | 0.668  |
| C(21) | -3.974 | -0.109 | 0.002  |
| O(22) | -2.964 | -1.026 | -0.353 |
| H(23) | -2.890 | 1.432  | -1.237 |
| H(24) | -3.365 | -2.514 | 1.071  |
| H(25) | -2.396 | -2.986 | -0.372 |
| H(26) | -4.164 | -2.728 | -0.509 |

### **A<sub>2</sub><sup>E</sup>**

total electronic energy  $E_{\text{tot}} = -722.574445136$  (Hartree/Particle)

Zero-point correction= 0.200338

Thermal correction to Energy= 0.215805

Thermal correction to Enthalpy= 0.216749

Thermal correction to Gibbs Free Energy= 0.153553

Sum of electronic and zero-point Energies= -722.374107

Sum of electronic and thermal Energies= -722.358640

Sum of electronic and thermal Enthalpies= -722.357696

Sum of electronic and thermal Free Energies= -722.420892

|       |        |        |        |
|-------|--------|--------|--------|
| O(1)  | 0.412  | 1.640  | -1.378 |
| C(2)  | -0.767 | 1.159  | -1.466 |
| C(3)  | -1.389 | 0.131  | -0.709 |
| C(4)  | -2.738 | -0.158 | -1.049 |
| C(5)  | -0.752 | -0.601 | 0.328  |
| C(6)  | -3.431 | -1.147 | -0.369 |
| C(7)  | -1.454 | -1.587 | 0.996  |
| C(8)  | -2.789 | -1.859 | 0.651  |
| H(9)  | 1.073  | 1.301  | -0.668 |
| H(10) | -1.352 | 1.637  | -2.254 |
| H(11) | -3.223 | 0.401  | -1.844 |
| H(12) | 0.277  | -0.405 | 0.603  |
| H(13) | -4.461 | -1.368 | -0.625 |
| H(14) | -0.972 | -2.153 | 1.786  |
| H(15) | -3.329 | -2.636 | 1.183  |
| C(16) | 3.423  | -0.458 | -1.006 |
| N(17) | 3.987  | -1.639 | -1.182 |
| N(18) | 4.461  | -2.654 | -1.327 |
| C(19) | 2.098  | 1.699  | 1.602  |
| O(20) | 2.880  | -0.873 | 1.284  |
| C(21) | 2.878  | -0.180 | 0.294  |
| O(22) | 2.259  | 1.089  | 0.287  |
| H(23) | 3.503  | 0.249  | -1.819 |
| H(24) | 1.501  | 1.061  | 2.254  |
| H(25) | 1.608  | 2.654  | 1.422  |
| H(26) | 3.083  | 1.856  | 2.043  |

### **A<sub>3</sub><sup>Z</sup>**

total electronic energy  $E_{\text{tot}} = -722.605040672$  (Hartree/Particle)

Zero-point correction= 0.198966

Thermal correction to Energy= 0.214194

Thermal correction to Enthalpy= 0.215138

Thermal correction to Gibbs Free Energy= 0.152388

Sum of electronic and zero-point Energies= -722.406075

Sum of electronic and thermal Energies= -722.390847

Sum of electronic and thermal Enthalpies= -722.389903

Sum of electronic and thermal Free Energies= -722.452653

|       |        |        |        |
|-------|--------|--------|--------|
| O(1)  | -0.165 | -0.053 | -0.020 |
| C(2)  | 0.857  | -0.777 | -0.015 |
| C(3)  | 2.204  | -0.277 | -0.010 |
| C(4)  | 2.475  | 1.110  | -0.010 |
| C(5)  | 3.265  | -1.206 | -0.004 |
| C(6)  | 3.789  | 1.550  | -0.004 |
| C(7)  | 4.579  | -0.757 | 0.001  |
| C(8)  | 4.838  | 0.618  | 0.001  |
| H(10) | 0.733  | -1.871 | -0.015 |
| H(11) | 1.648  | 1.812  | -0.014 |
| H(12) | 3.050  | -2.272 | -0.004 |

|       |        |        |        |
|-------|--------|--------|--------|
| H(13) | 4.009  | 2.612  | -0.005 |
| H(14) | 5.400  | -1.466 | 0.005  |
| H(15) | 5.865  | 0.970  | 0.005  |
| H(9)  | -1.344 | -0.632 | -0.024 |
| C(16) | -3.167 | 1.129  | -0.013 |
| N(17) | -4.240 | 1.906  | -0.007 |
| N(18) | -5.147 | 2.575  | 0.003  |
| C(19) | -4.783 | -2.173 | 0.003  |
| O(20) | -2.355 | -1.094 | -0.016 |
| C(21) | -3.336 | -0.280 | -0.010 |
| O(22) | -4.565 | -0.730 | -0.001 |
| H(23) | -2.203 | 1.617  | -0.022 |
| H(24) | -5.865 | -2.284 | 0.010  |
| H(25) | -4.337 | -2.610 | 0.896  |
| H(26) | -4.350 | -2.612 | -0.896 |

### **A<sub>3</sub><sup>E</sup>**

total electronic energy  $E_{\text{tot}} = -722.602395854$  (Hartree/Particle)

|                                              |             |
|----------------------------------------------|-------------|
| Zero-point correction=                       | 0.200059    |
| Thermal correction to Energy=                | 0.215248    |
| Thermal correction to Enthalpy=              | 0.216192    |
| Thermal correction to Gibbs Free Energy=     | 0.153703    |
| Sum of electronic and zero-point Energies=   | -722.402337 |
| Sum of electronic and thermal Energies=      | -722.387148 |
| Sum of electronic and thermal Enthalpies=    | -722.386204 |
| Sum of electronic and thermal Free Energies= | -722.448693 |

|       |        |        |        |
|-------|--------|--------|--------|
| O(1)  | 0.140  | -1.599 | -0.004 |
| C(2)  | -1.074 | -1.876 | -0.002 |
| C(3)  | -2.188 | -0.953 | -0.003 |
| C(4)  | -2.022 | 0.448  | -0.006 |
| C(5)  | -3.486 | -1.505 | -0.001 |
| C(6)  | -3.137 | 1.272  | -0.006 |
| C(7)  | -4.599 | -0.673 | -0.001 |
| C(8)  | -4.423 | 0.713  | -0.004 |
| H(9)  | -1.335 | -2.945 | -0.000 |
| H(10) | -1.028 | 0.882  | -0.008 |
| H(11) | -3.610 | -2.585 | 0.002  |
| H(12) | -3.017 | 2.351  | -0.009 |
| H(13) | -5.598 | -1.097 | 0.001  |
| H(14) | -5.291 | 1.365  | -0.004 |
| C(15) | 3.199  | -1.279 | -0.005 |
| N(16) | 4.498  | -1.547 | -0.004 |
| N(17) | 5.598  | -1.790 | -0.004 |
| C(18) | 3.311  | 2.399  | -0.000 |
| O(19) | 1.544  | 0.415  | -0.003 |
| C(20) | 2.781  | 0.073  | -0.003 |
| O(21) | 3.706  | 0.993  | -0.002 |
| H(22) | 2.514  | -2.116 | -0.006 |
| H(23) | 4.251  | 2.945  | 0.000  |
| H(24) | 2.730  | 2.615  | 0.897  |
| H(25) | 2.730  | 2.617  | -0.897 |
| H(26) | 0.861  | -0.402 | -0.004 |

### **AB<sup>HI'</sup>**

total electronic energy  $E_{\text{tot}} = -722.560537615$  (Hartree/Particle)

|                                              |             |
|----------------------------------------------|-------------|
| Zero-point correction=                       | 0.201253    |
| Thermal correction to Energy=                | 0.215763    |
| Thermal correction to Enthalpy=              | 0.216708    |
| Thermal correction to Gibbs Free Energy=     | 0.157765    |
| Sum of electronic and zero-point Energies=   | -722.359284 |
| Sum of electronic and thermal Energies=      | -722.344774 |
| Sum of electronic and thermal Enthalpies=    | -722.343830 |
| Sum of electronic and thermal Free Energies= | -722.402773 |

**$\nu = -198\text{cm}^{-1}$**

|       |        |        |        |
|-------|--------|--------|--------|
| O(1)  | -0.725 | -2.519 | -1.209 |
| C(2)  | -0.297 | -1.264 | -1.325 |
| C(3)  | -1.176 | -0.227 | -0.826 |
| C(4)  | -2.245 | -0.531 | 0.043  |
| C(5)  | -0.963 | 1.104  | -1.247 |
| C(6)  | -3.087 | 0.486  | 0.478  |
| C(7)  | -1.813 | 2.110  | -0.808 |
| C(8)  | -2.871 | 1.802  | 0.056  |
| H(9)  | -0.212 | -3.131 | -1.760 |
| H(10) | 0.366  | -1.026 | -2.157 |

|       |        |        |        |
|-------|--------|--------|--------|
| H(11) | -2.423 | -1.558 | 0.344  |
| H(12) | -0.151 | 1.331  | -1.932 |
| H(13) | -3.916 | 0.256  | 1.138  |
| H(14) | -1.664 | 3.131  | -1.144 |
| H(15) | -3.536 | 2.591  | 0.393  |
| C(16) | 1.428  | -1.201 | -0.069 |
| N(17) | 0.934  | -1.212 | 1.189  |
| N(18) | 0.367  | -1.160 | 2.157  |
| C(19) | 2.892  | 2.203  | 0.117  |
| O(20) | 2.551  | 0.140  | -1.642 |
| C(21) | 2.156  | 0.043  | -0.503 |
| O(22) | 2.227  | 0.953  | 0.462  |
| H(23) | 1.895  | -2.143 | -0.340 |
| H(24) | 2.870  | 2.795  | 1.029  |
| H(25) | 2.349  | 2.701  | -0.688 |
| H(26) | 3.916  | 2.000  | -0.196 |

### AB<sup>H1</sup>

total electronic energy  $E_{\text{tot}} = -722.558396044$  (Hartree/Particle)

|                                              |             |
|----------------------------------------------|-------------|
| Zero-point correction=                       | 0.201037    |
| Thermal correction to Energy=                | 0.215613    |
| Thermal correction to Enthalpy=              | 0.216557    |
| Thermal correction to Gibbs Free Energy=     | 0.157274    |
| Sum of electronic and zero-point Energies=   | -722.357359 |
| Sum of electronic and thermal Energies=      | -722.342783 |
| Sum of electronic and thermal Enthalpies=    | -722.341839 |
| Sum of electronic and thermal Free Energies= | -722.401122 |

$\nu = -180\text{cm}^{-1}$

|       |        |        |        |
|-------|--------|--------|--------|
| O(1)  | -0.628 | -2.669 | -1.380 |
| C(2)  | -0.347 | -1.376 | -1.331 |
| C(3)  | -1.238 | -0.406 | -0.720 |
| C(4)  | -2.158 | -0.765 | 0.287  |
| C(5)  | -1.185 | 0.927  | -1.179 |
| C(6)  | -3.021 | 0.190  | 0.810  |
| C(7)  | -2.057 | 1.874  | -0.654 |
| C(8)  | -2.973 | 1.507  | 0.337  |
| H(9)  | -1.414 | -2.895 | -0.856 |
| H(10) | 0.293  | -1.056 | -2.150 |
| H(11) | -2.203 | -1.780 | 0.678  |
| H(12) | -0.476 | 1.201  | -1.954 |
| H(13) | -3.731 | -0.085 | 1.582  |
| H(14) | -2.032 | 2.895  | -1.021 |
| H(15) | -3.654 | 2.248  | 0.744  |
| C(16) | 1.485  | -1.332 | -0.173 |
| N(17) | 1.157  | -1.557 | 1.113  |
| N(18) | 0.745  | -1.696 | 2.150  |
| C(19) | 2.739  | 2.118  | 0.341  |
| O(20) | 2.288  | 0.312  | -1.655 |
| C(21) | 2.062  | 0.016  | -0.504 |
| O(22) | 2.207  | 0.782  | 0.572  |
| H(23) | 1.935  | -2.196 | -0.654 |
| H(24) | 2.788  | 2.576  | 1.326  |
| H(25) | 2.073  | 2.675  | -0.319 |
| H(26) | 3.731  | 2.047  | -0.107 |

### B<sup>H1</sup>

total electronic energy  $E_{\text{tot}} = -722.569956349$  (Hartree/Particle)

|                                              |             |
|----------------------------------------------|-------------|
| Zero-point correction=                       | 0.202206    |
| Thermal correction to Energy=                | 0.216989    |
| Thermal correction to Enthalpy=              | 0.217933    |
| Thermal correction to Gibbs Free Energy=     | 0.158871    |
| Sum of electronic and zero-point Energies=   | -722.367750 |
| Sum of electronic and thermal Energies=      | -722.352967 |
| Sum of electronic and thermal Enthalpies=    | -722.352023 |
| Sum of electronic and thermal Free Energies= | -722.411085 |

|      |        |        |        |
|------|--------|--------|--------|
| O(1) | 0.390  | 1.488  | 2.477  |
| C(2) | 0.177  | 1.263  | 1.103  |
| C(3) | 1.182  | 0.350  | 0.440  |
| C(4) | 1.867  | -0.618 | 1.191  |
| C(5) | 1.442  | 0.478  | -0.932 |
| C(6) | 2.793  | -1.456 | 0.569  |
| C(7) | 2.365  | -0.366 | -1.548 |
| C(8) | 3.038  | -1.335 | -0.800 |
| C(9) | -1.306 | 0.722  | 1.081  |

|       |        |        |        |
|-------|--------|--------|--------|
| N(10) | -1.349 | -0.497 | 1.859  |
| N(11) | -1.274 | -1.440 | 2.434  |
| C(12) | -2.953 | -1.039 | -1.791 |
| O(13) | -1.834 | 1.397  | -1.134 |
| C(14) | -1.878 | 0.495  | -0.343 |
| O(15) | -2.372 | -0.721 | -0.484 |
| H(16) | 1.296  | 1.803  | 2.608  |
| H(17) | 0.071  | 2.196  | 0.530  |
| H(18) | 1.702  | -0.695 | 2.262  |
| H(19) | 0.933  | 1.241  | -1.514 |
| H(20) | 3.328  | -2.196 | 1.156  |
| H(21) | 2.570  | -0.258 | -2.608 |
| H(22) | 3.763  | -1.984 | -1.280 |
| H(23) | -1.940 | 1.425  | 1.635  |
| H(24) | -3.321 | -2.058 | -1.691 |
| H(25) | -2.178 | -0.970 | -2.555 |
| H(26) | -3.763 | -0.343 | -2.006 |

### BC<sup>H1</sup>

total electronic energy  $E_{\text{tot}} = -722.559136033$  (Hartree/Particle)

|                                              |             |
|----------------------------------------------|-------------|
| Zero-point correction=                       | 0.198746    |
| Thermal correction to Energy=                | 0.214083    |
| Thermal correction to Enthalpy=              | 0.215028    |
| Thermal correction to Gibbs Free Energy=     | 0.154344    |
| Sum of electronic and zero-point Energies=   | -722.360390 |
| Sum of electronic and thermal Energies=      | -722.345053 |
| Sum of electronic and thermal Enthalpies=    | -722.344108 |
| Sum of electronic and thermal Free Energies= | -722.404792 |

$\nu = -140\text{cm}^{-1}$

|       |        |        |        |
|-------|--------|--------|--------|
| O(1)  | 0.311  | 0.965  | -2.455 |
| C(2)  | 0.064  | -0.112 | -1.596 |
| C(3)  | 1.096  | -0.342 | -0.503 |
| C(4)  | 1.841  | 0.739  | -0.015 |
| C(5)  | 1.307  | -1.630 | 0.007  |
| C(6)  | 2.781  | 0.531  | 0.995  |
| C(7)  | 2.245  | -1.829 | 1.020  |
| C(8)  | 2.980  | -0.750 | 1.515  |
| C(9)  | -1.355 | 0.015  | -1.168 |
| C(10) | -2.823 | -1.418 | 1.970  |
| O(11) | -2.095 | -2.037 | -0.636 |
| C(12) | -1.946 | -0.929 | -0.165 |
| O(13) | -2.229 | -0.466 | 1.021  |
| H(14) | 1.191  | 0.862  | -2.845 |
| H(15) | -0.057 | -1.071 | -2.161 |
| H(16) | 1.699  | 1.731  | -0.432 |
| H(17) | 0.754  | -2.478 | -0.391 |
| H(18) | 3.360  | 1.368  | 1.369  |
| H(19) | 2.413  | -2.828 | 1.409  |
| H(20) | 3.717  | -0.909 | 2.295  |
| H(21) | -2.041 | 0.384  | -1.933 |
| H(22) | -3.062 | -0.820 | 2.845  |
| H(23) | -2.089 | -2.189 | 2.205  |
| H(24) | -3.717 | -1.859 | 1.530  |
| N(25) | -1.323 | 1.847  | -0.262 |
| N(26) | -1.403 | 2.828  | 0.237  |

### C<sup>H</sup>

total electronic energy  $E_{\text{tot}} = -613.127374310$  (Hartree/Particle)

|                                              |             |
|----------------------------------------------|-------------|
| Zero-point correction=                       | 0.194549    |
| Thermal correction to Energy=                | 0.206861    |
| Thermal correction to Enthalpy=              | 0.207805    |
| Thermal correction to Gibbs Free Energy=     | 0.153930    |
| Sum of electronic and zero-point Energies=   | -612.932826 |
| Sum of electronic and thermal Energies=      | -612.920513 |
| Sum of electronic and thermal Enthalpies=    | -612.919569 |
| Sum of electronic and thermal Free Energies= | -612.973445 |

|      |       |        |        |
|------|-------|--------|--------|
| O(1) | 0.197 | 2.379  | -0.306 |
| C(2) | 0.373 | 1.185  | 0.190  |
| C(3) | 1.596 | 0.464  | 0.040  |
| C(4) | 1.643 | -0.918 | 0.362  |
| C(5) | 2.770 | 1.105  | -0.445 |
| C(6) | 2.818 | -1.632 | 0.177  |
| C(7) | 3.939 | 0.386  | -0.606 |
| C(8) | 3.961 | -0.985 | -0.301 |

|       |        |        |        |
|-------|--------|--------|--------|
| C(9)  | -0.839 | 0.694  | 0.906  |
| C(10) | -3.922 | -0.612 | -0.728 |
| O(11) | -1.276 | -1.188 | -0.578 |
| C(12) | -1.713 | -0.225 | 0.006  |
| O(13) | -2.969 | 0.195  | 0.022  |
| H(14) | 0.948  | 2.692  | -0.841 |
| H(15) | 0.750  | -1.429 | 0.697  |
| H(16) | 2.793  | 2.173  | -0.651 |
| H(17) | 2.846  | -2.692 | 0.405  |
| H(18) | 4.838  | 0.880  | -0.958 |
| H(19) | 4.882  | -1.545 | -0.431 |
| H(20) | -1.432 | 1.554  | 1.221  |
| H(21) | -0.555 | 0.108  | 1.784  |
| H(22) | -4.882 | -0.123 | -0.579 |
| H(23) | -3.933 | -1.630 | -0.337 |
| H(24) | -3.645 | -0.623 | -1.784 |

### AB<sup>Ph2</sup>

total electronic energy  $E_{\text{tot}} = -722.556934401$  (Hartree/Particle)

Zero-point correction= 0.201036  
Thermal correction to Energy= 0.215656  
Thermal correction to Enthalpy= 0.216600  
Thermal correction to Gibbs Free Energy= 0.157218  
Sum of electronic and zero-point Energies= -722.355898  
Sum of electronic and thermal Energies= -722.341278  
Sum of electronic and thermal Enthalpies= -722.340334  
Sum of electronic and thermal Free Energies= -722.399717

$\nu = -178\text{cm}^{-1}$

|       |         |         |         |
|-------|---------|---------|---------|
| O(1)  | 0.3552  | -2.6440 | 0.4605  |
| C(2)  | 0.0941  | -1.3648 | 0.6587  |
| C(3)  | -1.1686 | -0.7448 | 0.3175  |
| C(4)  | -1.5499 | 0.4078  | 1.0361  |
| C(5)  | -2.0302 | -1.2751 | -0.6665 |
| C(6)  | -2.7827 | 1.0016  | 0.7901  |
| C(7)  | -3.2554 | -0.6714 | -0.9100 |
| C(8)  | -3.6330 | 0.4640  | -0.1801 |
| C(9)  | 1.5639  | -0.3483 | -0.6914 |
| N(10) | 2.6261  | -1.1295 | -0.4226 |
| N(11) | 3.4376  | -1.8440 | -0.1171 |
| C(12) | 1.0106  | 3.2686  | -0.3448 |
| O(13) | 2.0872  | 1.1931  | 1.0487  |
| C(14) | 1.6302  | 1.0096  | -0.0589 |
| O(15) | 1.0528  | 1.9066  | -0.8526 |
| H(16) | -0.3143 | -3.0769 | -0.0955 |
| H(17) | 0.6766  | -0.9497 | 1.4779  |
| H(18) | -0.8873 | 0.8118  | 1.7961  |
| H(19) | -1.7466 | -2.1428 | -1.2590 |
| H(20) | -3.0854 | 1.8759  | 1.3562  |
| H(21) | -3.9192 | -1.0774 | -1.6656 |
| H(22) | -4.5948 | 0.9288  | -0.3717 |
| H(23) | 1.2005  | -0.4636 | -1.7082 |
| H(24) | 0.4866  | 3.8390  | -1.1085 |
| H(25) | 2.0262  | 3.6418  | -0.2067 |
| H(26) | 0.4761  | 3.2985  | 0.6058  |

### B<sup>Ph2</sup>

total electronic energy  $E_{\text{tot}} = -722.568866038$

Zero-point correction= 0.201974 (Hartree/Particle)  
Thermal correction to Energy= 0.216872  
Thermal correction to Enthalpy= 0.217816  
Thermal correction to Gibbs Free Energy= 0.157974  
Sum of electronic and zero-point Energies= -722.366893  
Sum of electronic and thermal Energies= -722.351995  
Sum of electronic and thermal Enthalpies= -722.351051  
Sum of electronic and thermal Free Energies= -722.410892

|       |        |        |        |
|-------|--------|--------|--------|
| O(1)  | 0.934  | -3.025 | 0.416  |
| C(2)  | 0.673  | -1.746 | 0.615  |
| C(3)  | -0.590 | -1.126 | 0.273  |
| C(4)  | -0.971 | 0.027  | 0.992  |
| C(5)  | -1.452 | -1.656 | -0.710 |
| C(6)  | -2.204 | 0.621  | 0.746  |
| C(7)  | -2.677 | -1.052 | -0.954 |
| C(8)  | -3.054 | 0.083  | -0.224 |
| H(16) | 0.264  | -3.458 | -0.140 |



|       |        |        |        |
|-------|--------|--------|--------|
| H(17) | 1.255  | -1.331 | 1.434  |
| H(18) | -0.309 | 0.431  | 1.752  |
| H(19) | -1.168 | -2.524 | -1.303 |
| H(20) | -2.507 | 1.495  | 1.312  |
| H(21) | -3.341 | -1.458 | -1.710 |
| H(22) | -4.016 | 0.548  | -0.416 |
| C(9)  | 2.142  | -0.729 | -0.735 |
| N(10) | 3.205  | -1.511 | -0.467 |
| N(11) | 4.016  | -2.225 | -0.161 |
| C(12) | 1.589  | 2.888  | -0.389 |
| O(13) | 2.666  | 0.812  | 1.005  |
| C(14) | 2.209  | 0.629  | -0.103 |
| O(15) | 1.631  | 1.526  | -0.897 |
| H(23) | 1.779  | -0.845 | -1.752 |
| H(24) | 1.065  | 3.458  | -1.152 |
| H(25) | 2.605  | 3.261  | -0.251 |
| H(26) | 1.055  | 2.917  | 0.562  |

### BC<sup>Ph2</sup>

total electronic energy  $E_{\text{tot}} = -722.563448537$  (Hartree/Particle)

Zero-point correction= 0.200189

Thermal correction to Energy= 0.215321

Thermal correction to Enthalpy= 0.216266

Thermal correction to Gibbs Free Energy= 0.156080

Sum of electronic and zero-point Energies= -722.363259

Sum of electronic and thermal Energies= -722.348127

Sum of electronic and thermal Enthalpies= -722.347183

Sum of electronic and thermal Free Energies= -722.407369

$\nu = -363\text{cm}^{-1}$

|       |        |        |        |
|-------|--------|--------|--------|
| O(1)  | -0.850 | -2.728 | -0.557 |
| C(2)  | -0.783 | -1.324 | -0.594 |
| C(3)  | 0.581  | -0.715 | -0.285 |
| C(4)  | 0.991  | 0.461  | -0.934 |
| C(5)  | 1.418  | -1.329 | 0.663  |
| C(6)  | 2.237  | 1.009  | -0.646 |
| C(7)  | 2.665  | -0.775 | 0.942  |
| C(8)  | 3.072  | 0.394  | 0.293  |
| C(9)  | -1.594 | -0.841 | 0.582  |
| C(10) | -3.027 | 2.462  | -0.358 |
| O(11) | -1.619 | 1.278  | 1.676  |
| C(12) | -1.953 | 0.645  | 0.710  |
| O(13) | -2.626 | 1.056  | -0.358 |
| H(14) | -0.217 | -3.093 | -1.193 |
| H(15) | -1.185 | -0.902 | -1.524 |
| H(16) | 0.348  | 0.928  | -1.676 |
| H(17) | 1.104  | -2.247 | 1.149  |
| H(18) | 2.564  | 1.908  | -1.158 |
| H(19) | 3.319  | -1.254 | 1.663  |
| H(20) | 4.044  | 0.824  | 0.513  |
| H(21) | -1.329 | -1.295 | 1.536  |
| H(22) | -3.592 | 2.594  | -1.277 |
| H(23) | -2.137 | 3.093  | -0.345 |
| H(24) | -3.642 | 2.666  | 0.519  |
| N(25) | -3.152 | -1.627 | 0.384  |
| N(26) | -4.044 | -2.208 | 0.089  |

### C<sup>Ph</sup>

total electronic energy  $E_{\text{tot}} = -613.092784644$  (Hartree/Particle)

Zero-point correction= 0.193672

Thermal correction to Energy= 0.206200

Thermal correction to Enthalpy= 0.207145

Thermal correction to Gibbs Free Energy= 0.153323

Sum of electronic and zero-point Energies= -612.899113

Sum of electronic and thermal Energies= -612.886584

Sum of electronic and thermal Enthalpies= -612.885640

Sum of electronic and thermal Free Energies= -612.939461

|      |        |        |        |
|------|--------|--------|--------|
| O(1) | 0.344  | 2.265  | 0.273  |
| C(2) | 0.468  | 1.005  | 0.517  |
| C(3) | -0.974 | -0.449 | -0.301 |
| C(4) | -2.051 | 0.233  | -0.903 |
| C(5) | -1.220 | -1.533 | 0.565  |
| C(6) | -3.352 | -0.206 | -0.691 |

|       |        |        |        |
|-------|--------|--------|--------|
| C(7)  | -2.527 | -1.961 | 0.772  |
| C(8)  | -3.590 | -1.301 | 0.147  |
| C(9)  | 0.453  | 0.043  | -0.577 |
| C(10) | 3.848  | -1.296 | 0.108  |
| O(11) | 1.454  | -2.151 | -0.876 |
| C(12) | 1.568  | -1.019 | -0.492 |
| O(13) | 2.660  | -0.454 | 0.037  |
| H(14) | 0.255  | 2.814  | 1.075  |
| H(15) | 0.529  | 0.667  | 1.551  |
| H(16) | -1.862 | 1.084  | -1.551 |
| H(17) | -0.398 | -2.069 | 1.026  |
| H(18) | -4.180 | 0.301  | -1.176 |
| H(19) | -2.718 | -2.814 | 1.415  |
| H(20) | -4.608 | -1.640 | 0.315  |
| H(21) | 0.519  | 0.549  | -1.544 |
| H(22) | 4.608  | -0.677 | 0.581  |
| H(23) | 4.151  | -1.586 | -0.899 |
| H(24) | 3.637  | -2.186 | 0.703  |

### AB<sup>OH1</sup>

total electronic energy  $E_{\text{tot}} = -722.567080484$  (Hartree/Particle)  
Zero-point correction= 0.201666  
Thermal correction to Energy= 0.215820  
Thermal correction to Enthalpy= 0.216764  
Thermal correction to Gibbs Free Energy= 0.159340  
Sum of electronic and zero-point Energies= -722.365415  
Sum of electronic and thermal Energies= -722.351261  
Sum of electronic and thermal Enthalpies= -722.350317  
Sum of electronic and thermal Free Energies= -722.407740

|       |         |         |         |
|-------|---------|---------|---------|
| O(1)  | 0.0728  | 2.2004  | 0.1676  |
| C(2)  | -0.1594 | 0.9363  | 0.5345  |
| C(3)  | -1.5235 | 0.4413  | 0.3348  |
| C(4)  | -2.3971 | 1.0682  | -0.5732 |
| C(5)  | -1.9570 | -0.6770 | 1.0730  |
| C(6)  | -3.6883 | 0.5791  | -0.7313 |
| C(7)  | -3.2525 | -1.1600 | 0.9064  |
| C(8)  | -4.1150 | -0.5342 | 0.0035  |
| H(9)  | 1.0079  | 2.4316  | 0.3438  |
| H(10) | 0.3386  | 0.5976  | 1.4465  |
| H(11) | -2.0656 | 1.9411  | -1.1251 |
| H(12) | -1.2948 | -1.1430 | 1.7985  |
| H(13) | -4.3689 | 1.0665  | -1.4214 |
| H(14) | -3.5915 | -2.0125 | 1.4850  |
| H(15) | -5.1260 | -0.9079 | -0.1233 |
| C(16) | 1.0226  | -0.0008 | -0.7093 |
| N(17) | 0.7034  | -1.3279 | -0.7969 |
| N(18) | 0.3041  | -2.3720 | -0.7340 |
| C(19) | 4.5124  | -0.5871 | 0.4721  |
| O(20) | 2.7221  | 1.4424  | 0.0782  |
| C(21) | 2.4191  | 0.2992  | -0.1983 |
| O(22) | 3.1626  | -0.7821 | -0.0593 |
| H(23) | 0.7485  | 0.5154  | -1.6283 |
| H(24) | 4.9392  | -1.5860 | 0.5178  |
| H(25) | 4.4538  | -0.1341 | 1.4622  |
| H(26) | 5.0777  | 0.0540  | -0.2044 |

### AB<sup>OH2</sup>

#### B<sup>OH1</sup>

total electronic energy  $E_{\text{tot}} = -722.568667361$  (Hartree/Particle)  
Zero-point correction= 0.202279  
Thermal correction to Energy= 0.216919  
Thermal correction to Enthalpy= 0.217863  
Thermal correction to Gibbs Free Energy= 0.159104  
Sum of electronic and zero-point Energies= -722.366388  
Sum of electronic and thermal Energies= -722.351748  
Sum of electronic and thermal Enthalpies= -722.350804  
Sum of electronic and thermal Free Energies= -722.409564

|      |        |       |        |
|------|--------|-------|--------|
| O(1) | 0.117  | 2.128 | 0.072  |
| C(2) | -0.059 | 0.803 | 0.401  |
| C(3) | -1.468 | 0.341 | 0.184  |
| C(4) | -2.247 | 0.889 | -0.844 |

|       |        |        |        |
|-------|--------|--------|--------|
| C(5)  | -1.999 | -0.662 | 1.008  |
| C(6)  | -3.547 | 0.431  | -1.044 |
| C(7)  | -3.302 | -1.118 | 0.801  |
| C(8)  | -4.073 | -0.574 | -0.226 |
| C(9)  | 0.989  | 0.010  | -0.638 |
| N(10) | 0.687  | -1.372 | -0.717 |
| N(11) | 0.311  | -2.416 | -0.640 |
| C(12) | 4.601  | -0.743 | 0.047  |
| O(13) | 2.805  | 1.335  | 0.155  |
| C(14) | 2.460  | 0.241  | -0.219 |
| O(15) | 3.186  | -0.855 | -0.323 |
| H(16) | 1.005  | 2.416  | 0.346  |
| H(17) | 0.306  | 0.544  | 1.402  |
| H(18) | -1.847 | 1.689  | -1.459 |
| H(19) | -1.413 | -1.063 | 1.832  |
| H(20) | -4.155 | 0.864  | -1.832 |
| H(21) | -3.715 | -1.884 | 1.448  |
| H(22) | -5.089 | -0.923 | -0.384 |
| H(23) | 0.788  | 0.429  | -1.629 |
| H(24) | 5.002  | -1.744 | -0.090 |
| H(25) | 4.680  | -0.420 | 1.085  |
| H(26) | 5.089  | -0.026 | -0.614 |

### **B<sup>Ph1</sup>**

total electronic energy  $E_{\text{tot}} = -722.566904057$  (Hartree/Particle)  
Zero-point correction= 0.202028  
Thermal correction to Energy= 0.216832  
Thermal correction to Enthalpy= 0.217776  
Thermal correction to Gibbs Free Energy= 0.158733  
Sum of electronic and zero-point Energies= -722.364876  
Sum of electronic and thermal Energies= -722.350072  
Sum of electronic and thermal Enthalpies= -722.349128  
Sum of electronic and thermal Free Energies= -722.408171

|       |        |        |        |
|-------|--------|--------|--------|
| O(1)  | 0.855  | -1.047 | 1.287  |
| C(2)  | 0.214  | -1.380 | 0.079  |
| C(3)  | -1.112 | -0.708 | -0.180 |
| C(4)  | -1.430 | 0.518  | 0.418  |
| C(5)  | -2.048 | -1.348 | -1.006 |
| C(6)  | -2.680 | 1.093  | 0.195  |
| C(7)  | -3.289 | -0.762 | -1.237 |
| C(8)  | -3.606 | 0.459  | -0.636 |
| C(9)  | 1.296  | -0.976 | -1.009 |
| N(10) | 2.449  | -1.834 | -0.779 |
| N(11) | 3.287  | -2.507 | -0.508 |
| C(12) | 3.543  | 1.961  | -0.382 |
| O(13) | 1.003  | 1.382  | -1.272 |
| C(14) | 1.758  | 0.512  | -0.941 |
| O(15) | 3.003  | 0.607  | -0.504 |
| H(16) | 0.232  | -1.168 | 2.018  |
| H(17) | 0.089  | -2.468 | -0.032 |
| H(18) | -0.708 | 1.017  | 1.056  |
| H(19) | -1.815 | -2.312 | -1.454 |
| H(20) | -2.929 | 2.039  | 0.666  |
| H(21) | -4.013 | -1.262 | -1.872 |
| H(22) | -4.576 | 0.912  | -0.810 |
| H(23) | 0.948  | -1.216 | -2.018 |
| H(24) | 4.576  | 1.823  | -0.074 |
| H(25) | 2.976  | 2.507  | 0.372  |
| H(26) | 3.479  | 2.467  | -1.346 |

### **B<sup>H2</sup>**

total electronic energy  $E_{\text{tot}} = -722.568979133$  (Hartree/Particle)  
Zero-point correction= 0.201843  
Thermal correction to Energy= 0.216786  
Thermal correction to Enthalpy= 0.217730  
Thermal correction to Gibbs Free Energy= 0.157688  
Sum of electronic and zero-point Energies= -722.367136  
Sum of electronic and thermal Energies= -722.352193  
Sum of electronic and thermal Enthalpies= -722.351249  
Sum of electronic and thermal Free Energies= -722.411291

|      |        |        |        |
|------|--------|--------|--------|
| O(1) | -0.348 | -0.708 | 1.793  |
| C(2) | 0.041  | -1.065 | 0.504  |
| C(3) | 1.473  | -0.692 | 0.210  |
| C(4) | 2.089  | -1.183 | -0.951 |
| C(5) | 2.183  | 0.150  | 1.074  |

|       |        |        |        |
|-------|--------|--------|--------|
| C(6)  | 3.403  | -0.828 | -1.248 |
| C(7)  | 3.500  | 0.501  | 0.772  |
| C(8)  | 4.108  | 0.018  | -0.387 |
| C(9)  | -0.965 | -0.341 | -0.527 |
| N(10) | -0.744 | 1.071  | -0.419 |
| N(11) | -0.477 | 2.120  | -0.178 |
| C(12) | -4.673 | 0.142  | -0.211 |
| O(13) | -2.732 | -1.781 | 0.175  |
| C(14) | -2.449 | -0.679 | -0.212 |
| O(15) | -3.240 | 0.351  | -0.446 |
| H(16) | -0.967 | -1.366 | 2.140  |
| H(17) | -0.156 | -2.120 | 0.275  |
| H(18) | 1.556  | -1.864 | -1.613 |
| H(19) | 1.719  | 0.497  | 1.990  |
| H(20) | 3.879  | -1.220 | -2.140 |
| H(21) | 4.053  | 1.144  | 1.449  |
| H(22) | 5.134  | 0.289  | -0.616 |
| H(23) | -0.722 | -0.602 | -1.563 |
| H(24) | -5.134 | 1.100  | -0.439 |
| H(25) | -4.831 | -0.138 | 0.831  |
| H(26) | -5.036 | -0.641 | -0.876 |

### **B<sup>OH2</sup>**

total electronic energy  $E_{\text{tot}} = -722.564738425$  (Hartree/Particle)  
Zero-point correction= 0.202342  
Thermal correction to Energy= 0.216967  
Thermal correction to Enthalpy= 0.217912  
Thermal correction to Gibbs Free Energy= 0.159402  
Sum of electronic and zero-point Energies= -722.362397  
Sum of electronic and thermal Energies= -722.347771  
Sum of electronic and thermal Enthalpies= -722.346827  
Sum of electronic and thermal Free Energies= -722.405336

|       |        |        |        |
|-------|--------|--------|--------|
| O(1)  | -0.341 | -1.336 | 2.171  |
| C(2)  | 0.034  | -1.521 | 0.861  |
| C(3)  | 1.089  | -0.625 | 0.264  |
| C(4)  | 2.008  | -1.188 | -0.634 |
| C(5)  | 1.186  | 0.738  | 0.586  |
| C(6)  | 3.002  | -0.399 | -1.214 |
| C(7)  | 2.184  | 1.520  | 0.009  |
| C(8)  | 3.089  | 0.956  | -0.894 |
| C(9)  | -1.402 | -1.428 | 0.017  |
| N(10) | -1.214 | -1.867 | -1.318 |
| N(11) | -0.892 | -2.194 | -2.331 |
| C(12) | -2.998 | 1.721  | -1.252 |
| O(13) | -2.054 | 0.611  | 1.080  |
| C(14) | -2.000 | 0.003  | 0.041  |
| O(15) | -2.404 | 0.384  | -1.155 |
| H(16) | -0.588 | -0.410 | 2.331  |
| H(17) | 0.326  | -2.570 | 0.758  |
| H(18) | 1.975  | -2.252 | -0.855 |
| H(19) | 0.502  | 1.196  | 1.294  |
| H(20) | 3.716  | -0.847 | -1.897 |
| H(21) | 2.262  | 2.570  | 0.272  |
| H(22) | 3.867  | 1.570  | -1.336 |
| H(23) | -2.091 | -2.138 | 0.489  |
| H(24) | -3.282 | 1.822  | -2.296 |
| H(25) | -2.256 | 2.466  | -0.967 |
| H(26) | -3.867 | 1.777  | -0.596 |

### **BC<sup>OH2</sup>**

total electronic energy  $E_{\text{tot}} = -722.550872263$  (Hartree/Particle)  
Zero-point correction= 0.200354  
Thermal correction to Energy= 0.215291  
Thermal correction to Enthalpy= 0.216235  
Thermal correction to Gibbs Free Energy= 0.156652  
Sum of electronic and zero-point Energies= -722.350518  
Sum of electronic and thermal Energies= -722.335582  
Sum of electronic and thermal Enthalpies= -722.334638  
Sum of electronic and thermal Free Energies= -722.394220

|      |         |         |         |
|------|---------|---------|---------|
| O(1) | 0.5615  | -0.2183 | 2.3217  |
| C(2) | -0.1146 | 0.6056  | 1.3611  |
| C(3) | -1.2356 | 0.0038  | 0.5611  |
| C(4) | -2.4607 | 0.6840  | 0.5291  |
| C(5) | -1.1044 | -1.2122 | -0.1291 |

|       |         |         |         |
|-------|---------|---------|---------|
| C(6)  | -3.5354 | 0.1672  | -0.1934 |
| C(7)  | -2.1833 | -1.7300 | -0.8424 |
| C(8)  | -3.3971 | -1.0395 | -0.8796 |
| C(9)  | 1.1982  | 0.9471  | 0.6797  |
| N(10) | 0.7908  | 2.3075  | -0.5575 |
| N(11) | 0.4325  | 3.1188  | -1.2142 |
| C(12) | 3.0353  | -2.0690 | -0.5096 |
| O(13) | 2.2731  | 0.3897  | -1.3983 |
| C(14) | 1.9524  | 0.0232  | -0.2976 |
| O(15) | 2.2164  | -1.1406 | 0.2795  |
| H(16) | 0.6003  | -1.1326 | 1.9944  |
| H(17) | -0.4728 | 1.4823  | 1.9046  |
| H(18) | -2.5800 | 1.6147  | 1.0776  |
| H(19) | -0.1740 | -1.7719 | -0.1087 |
| H(20) | -4.4798 | 0.7009  | -0.2104 |
| H(21) | -2.0777 | -2.6734 | -1.3679 |
| H(22) | -4.2343 | -1.4463 | -1.4373 |
| H(23) | 1.8513  | 1.5750  | 1.2861  |
| H(24) | 2.5045  | -2.3345 | -1.4240 |
| H(25) | 3.1747  | -2.9316 | 0.1372  |
| H(26) | 3.9868  | -1.5944 | -0.7486 |

### BB<sup>H-Ph1</sup>

total electronic energy  $E_{\text{tot}} = -722.562462033$  (Hartree/Particle)  
Zero-point correction= 0.202171  
Thermal correction to Energy= 0.216062  
Thermal correction to Enthalpy= 0.217006  
Thermal correction to Gibbs Free Energy= 0.161024  
Sum of electronic and zero-point Energies= -722.360291  
Sum of electronic and thermal Energies= -722.346400  
Sum of electronic and thermal Enthalpies= -722.345456  
Sum of electronic and thermal Free Energies= -722.401438  
 **$\nu = -38\text{cm}^{-1}$**

|       |        |        |        |
|-------|--------|--------|--------|
| O(1)  | -1.269 | -2.627 | -0.467 |
| C(2)  | -0.737 | -1.877 | 0.603  |
| C(3)  | 0.552  | -1.169 | 0.289  |
| C(4)  | 0.778  | -0.635 | -0.990 |
| C(5)  | 1.540  | -1.058 | 1.277  |
| C(6)  | 1.986  | -0.002 | -1.273 |
| C(7)  | 2.745  | -0.420 | 0.989  |
| C(8)  | 2.968  | 0.108  | -0.284 |
| C(9)  | -1.946 | -0.862 | 0.994  |
| N(10) | -3.073 | -1.133 | 0.140  |
| N(11) | -3.910 | -1.323 | -0.560 |
| C(12) | -1.618 | 2.590  | -0.429 |
| O(13) | -1.004 | 1.155  | 1.844  |
| C(14) | -1.582 | 0.651  | 0.923  |
| O(15) | -1.968 | 1.184  | -0.225 |
| H(16) | -0.567 | -3.187 | -0.831 |
| H(17) | -0.616 | -2.491 | 1.504  |
| H(18) | 0.020  | -0.734 | -1.761 |
| H(19) | 1.371  | -1.475 | 2.266  |
| H(20) | 2.167  | 0.397  | -2.266 |
| H(21) | 3.511  | -0.342 | 1.754  |
| H(22) | 3.910  | 0.599  | -0.509 |
| H(23) | -2.306 | -1.072 | 2.005  |
| H(24) | -2.092 | 2.863  | -1.369 |
| H(25) | -0.533 | 2.680  | -0.492 |
| H(26) | -2.002 | 3.187  | 0.398  |

### BB<sup>H-OH1</sup>

total electronic energy  $E_{\text{tot}} = -722.562032927$  (Hartree/Particle)  
Zero-point correction= 0.201718  
Thermal correction to Energy= 0.215786  
Thermal correction to Enthalpy= 0.216730  
Thermal correction to Gibbs Free Energy= 0.159829  
Sum of electronic and zero-point Energies= -722.360314  
Sum of electronic and thermal Energies= -722.346247  
Sum of electronic and thermal Enthalpies= -722.345303  
Sum of electronic and thermal Free Energies= -722.402204  
 **$\nu = -31\text{cm}^{-1}$**

|      |        |       |        |
|------|--------|-------|--------|
| O(1) | -0.244 | 1.885 | -0.727 |
| C(2) | -0.214 | 0.642 | -0.063 |

|       |        |        |        |
|-------|--------|--------|--------|
| C(3)  | -1.539 | -0.091 | -0.034 |
| C(4)  | -2.469 | 0.089  | -1.068 |
| C(5)  | -1.830 | -0.963 | 1.024  |
| C(6)  | -3.680 | -0.603 | -1.040 |
| C(7)  | -3.040 | -1.656 | 1.044  |
| C(8)  | -3.964 | -1.478 | 0.011  |
| C(9)  | 0.927  | -0.102 | -0.883 |
| N(10) | 0.478  | -1.383 | -1.372 |
| N(11) | 0.131  | -2.384 | -1.692 |
| C(12) | 4.252  | -1.597 | 0.014  |
| O(13) | 2.595  | 0.492  | 0.736  |
| C(14) | 2.277  | -0.292 | -0.112 |
| O(15) | 2.933  | -1.342 | -0.574 |
| H(16) | -0.778 | 2.506  | -0.209 |
| H(17) | 0.197  | 0.732  | 0.951  |
| H(18) | -2.253 | 0.788  | -1.870 |
| H(19) | -1.124 | -1.085 | 1.843  |
| H(20) | -4.404 | -0.453 | -1.834 |
| H(21) | -3.268 | -2.322 | 1.870  |
| H(22) | -4.909 | -2.010 | 0.032  |
| H(23) | 1.116  | 0.491  | -1.788 |
| H(24) | 4.601  | -2.506 | -0.469 |
| H(25) | 4.148  | -1.732 | 1.091  |
| H(26) | 4.909  | -0.755 | -0.202 |

### BB<sup>Ph-H2</sup>

total electronic energy  $E_{\text{tot}} = -722.565880948$  (Hartree/Particle)  
Zero-point correction= 0.202155  
Thermal correction to Energy= 0.216105  
Thermal correction to Enthalpy= 0.217049  
Thermal correction to Gibbs Free Energy= 0.160304  
Sum of electronic and zero-point Energies= -722.363726  
Sum of electronic and thermal Energies= -722.349776  
Sum of electronic and thermal Enthalpies= -722.348832  
Sum of electronic and thermal Free Energies= -722.405576

$\nu = -35\text{cm}^{-1}$

|       |        |        |        |
|-------|--------|--------|--------|
| O(1)  | 0.122  | 1.682  | 1.006  |
| C(2)  | 0.256  | 0.386  | 0.465  |
| C(3)  | 1.630  | 0.044  | -0.050 |
| C(4)  | 2.050  | -1.294 | -0.039 |
| C(5)  | 2.478  | 1.042  | -0.552 |
| C(6)  | 3.313  | -1.629 | -0.524 |
| C(7)  | 3.742  | 0.701  | -1.029 |
| C(8)  | 4.159  | -0.634 | -1.018 |
| C(9)  | -0.835 | 0.327  | -0.715 |
| N(10) | -1.403 | 1.634  | -0.914 |
| N(11) | -1.802 | 2.664  | -0.991 |
| C(12) | -4.283 | -1.163 | -0.677 |
| O(13) | -1.682 | -1.789 | -0.004 |
| C(14) | -1.967 | -0.715 | -0.457 |
| O(15) | -3.146 | -0.251 | -0.831 |
| H(16) | 0.815  | 1.813  | 1.669  |
| H(17) | -0.085 | -0.387 | 1.164  |
| H(18) | 1.393  | -2.066 | 0.352  |
| H(19) | 2.159  | 2.080  | -0.551 |
| H(20) | 3.640  | -2.664 | -0.508 |
| H(21) | 4.404  | 1.474  | -1.406 |
| H(22) | 5.145  | -0.895 | -1.389 |
| H(23) | -0.354 | 0.084  | -1.669 |
| H(24) | -5.145 | -0.592 | -1.014 |
| H(25) | -4.378 | -1.447 | 0.371  |
| H(26) | -4.123 | -2.045 | -1.298 |

### BB<sup>Ph-OH2</sup>

total electronic energy  $E_{\text{tot}} = -722.558588793$  (Hartree/Particle)  
Zero-point correction= 0.201688  
Thermal correction to Energy= 0.215698  
Thermal correction to Enthalpy= 0.216642  
Thermal correction to Gibbs Free Energy= 0.160087  
Sum of electronic and zero-point Energies= -722.356901  
Sum of electronic and thermal Energies= -722.342891  
Sum of electronic and thermal Enthalpies= -722.341947  
Sum of electronic and thermal Free Energies= -722.398502

$\nu = -39\text{cm}^{-1}$

|       |        |        |        |
|-------|--------|--------|--------|
| O(1)  | 0.815  | -2.818 | -1.224 |
| C(2)  | 0.814  | -1.833 | -0.224 |
| C(3)  | -0.456 | -1.029 | -0.116 |
| C(4)  | -0.900 | -0.604 | 1.144  |
| C(5)  | -1.210 | -0.729 | -1.261 |
| C(6)  | -2.090 | 0.113  | 1.260  |
| C(7)  | -2.401 | -0.017 | -1.139 |
| C(8)  | -2.840 | 0.406  | 0.119  |
| C(9)  | 2.109  | -0.950 | -0.664 |
| N(10) | 3.074  | -0.980 | 0.396  |
| N(11) | 3.771  | -0.994 | 1.259  |
| C(12) | 1.696  | 2.748  | -0.258 |
| O(13) | 1.455  | 0.781  | -2.175 |
| C(14) | 1.819  | 0.526  | -1.063 |
| O(15) | 2.000  | 1.334  | -0.030 |
| H(16) | -0.054 | -3.245 | -1.242 |
| H(17) | 1.060  | -2.255 | 0.762  |
| H(18) | -0.331 | -0.852 | 2.037  |
| H(19) | -0.866 | -1.052 | -2.238 |
| H(20) | -2.438 | 0.428  | 2.238  |
| H(21) | -2.987 | 0.207  | -2.024 |
| H(22) | -3.771 | 0.957  | 0.210  |
| H(23) | 2.577  | -1.475 | -1.503 |
| H(24) | 1.962  | 3.245  | 0.672  |
| H(25) | 0.633  | 2.853  | -0.474 |
| H(26) | 2.293  | 3.118  | -1.092 |

### BC<sup>Ph1</sup>

total electronic energy  $E_{\text{tot}} = -722.560940757$  (Hartree/Particle)

Zero-point correction= 0.199886  
Thermal correction to Energy= 0.215027  
Thermal correction to Enthalpy= 0.215972  
Thermal correction to Gibbs Free Energy= 0.155732  
Sum of electronic and zero-point Energies= -722.361054  
Sum of electronic and thermal Energies= -722.345913  
Sum of electronic and thermal Enthalpies= -722.344969  
Sum of electronic and thermal Free Energies= -722.405209

$\nu = -309\text{cm}^{-1}$

|       |        |        |        |
|-------|--------|--------|--------|
| O(1)  | 0.172  | -0.743 | 1.881  |
| C(2)  | -0.160 | -1.043 | 0.552  |
| C(3)  | -1.342 | -0.271 | -0.039 |
| C(4)  | -1.712 | 0.974  | 0.488  |
| C(5)  | -2.066 | -0.835 | -1.101 |
| C(6)  | -2.820 | 1.637  | -0.034 |
| C(7)  | -3.164 | -0.159 | -1.625 |
| C(8)  | -3.541 | 1.077  | -1.092 |
| C(9)  | 1.032  | -0.639 | -0.284 |
| C(10) | 3.481  | 1.925  | 0.923  |
| O(11) | 1.154  | 1.680  | -0.514 |
| C(12) | 1.700  | 0.715  | -0.044 |
| O(13) | 2.813  | 0.650  | 0.660  |
| H(14) | -0.610 | -0.869 | 2.438  |
| H(15) | -0.335 | -2.118 | 0.394  |
| H(16) | -1.146 | 1.411  | 1.303  |
| H(17) | -1.790 | -1.808 | -1.499 |
| H(18) | -3.118 | 2.594  | 0.382  |
| H(19) | -3.731 | -0.599 | -2.439 |
| H(20) | -4.401 | 1.601  | -1.498 |
| H(21) | 0.982  | -0.925 | -1.334 |
| H(22) | 4.401  | 1.657  | 1.437  |
| H(23) | 2.841  | 2.541  | 1.554  |
| H(24) | 3.686  | 2.432  | -0.020 |
| N(25) | 2.309  | -1.832 | 0.218  |
| N(26) | 2.962  | -2.594 | 0.678  |

### BC<sup>H2</sup>

total electronic energy  $E_{\text{tot}} = -722.559136033$  (Hartree/Particle)

Zero-point correction= 0.198746  
Thermal correction to Energy= 0.214083  
Thermal correction to Enthalpy= 0.215028  
Thermal correction to Gibbs Free Energy= 0.154344  
Sum of electronic and zero-point Energies= -722.360390  
Sum of electronic and thermal Energies= -722.345053  
Sum of electronic and thermal Enthalpies= -722.344108  
Sum of electronic and thermal Free Energies= -722.404792

$\nu = -249\text{cm}^{-1}$

|       |        |        |        |
|-------|--------|--------|--------|
| O(1)  | 0.084  | 2.590  | -1.236 |
| C(2)  | -0.126 | 1.208  | -1.163 |
| C(3)  | 0.966  | 0.404  | -0.474 |
| C(4)  | 1.752  | 1.009  | 0.513  |
| C(5)  | 1.189  | -0.932 | -0.832 |
| C(6)  | 2.747  | 0.270  | 1.154  |
| C(7)  | 2.182  | -1.666 | -0.184 |
| C(8)  | 2.960  | -1.066 | 0.809  |
| C(9)  | -1.516 | 1.025  | -0.665 |
| C(10) | -2.815 | -2.013 | 1.105  |
| O(11) | -2.250 | -0.965 | -1.402 |
| C(12) | -2.058 | -0.342 | -0.378 |
| O(13) | -2.266 | -0.672 | 0.867  |
| H(14) | 0.938  | 2.757  | -1.661 |
| H(15) | -0.293 | 0.762  | -2.176 |
| H(16) | 1.599  | 2.053  | 0.769  |
| H(17) | 0.603  | -1.397 | -1.621 |
| H(18) | 3.359  | 0.740  | 1.916  |
| H(19) | 2.360  | -2.698 | -0.467 |
| H(20) | 3.739  | -1.636 | 1.304  |
| H(21) | -2.240 | 1.757  | -1.027 |
| H(22) | -2.994 | -2.050 | 2.176  |
| H(23) | -2.078 | -2.757 | 0.801  |
| H(24) | -3.739 | -2.132 | 0.541  |
| N(25) | -1.406 | 1.974  | 1.142  |
| N(26) | -1.444 | 2.473  | 2.126  |

### BC<sup>OH</sup>

total electronic energy  $E_{\text{tot}} = -722.558837069$  (Hartree/Particle)  
Zero-point correction= 0.200512  
Thermal correction to Energy= 0.215412  
Thermal correction to Enthalpy= 0.216356  
Thermal correction to Gibbs Free Energy= 0.156522  
Sum of electronic and zero-point Energies= -722.358325  
Sum of electronic and thermal Energies= -722.343425  
Sum of electronic and thermal Enthalpies= -722.342481  
Sum of electronic and thermal Free Energies= -722.402315

$\nu = -335\text{cm}^{-1}$

|       |         |         |         |
|-------|---------|---------|---------|
| O(1)  | -0.1777 | -2.1452 | -0.0382 |
| C(2)  | 0.1231  | -0.8561 | 0.4996  |
| C(3)  | 1.5432  | -0.4378 | 0.2474  |
| C(4)  | 2.1743  | -0.7478 | -0.9658 |
| C(5)  | 2.2302  | 0.2854  | 1.2299  |
| C(6)  | 3.4842  | -0.3293 | -1.1904 |
| C(7)  | 3.5387  | 0.7086  | 0.9963  |
| C(8)  | 4.1642  | 0.4029  | -0.2134 |
| C(9)  | -0.9245 | -0.1787 | -0.3727 |
| C(10) | -4.5886 | 0.5260  | -0.1415 |
| O(11) | -2.7271 | -1.3063 | 0.6975  |
| C(12) | -2.3962 | -0.3515 | 0.0322  |
| O(13) | -3.1558 | 0.6139  | -0.4415 |
| H(14) | -0.9410 | -2.5093 | 0.4471  |
| H(15) | -0.1408 | -0.7770 | 1.5579  |
| H(16) | 1.6604  | -1.3447 | -1.7137 |
| H(17) | 1.7538  | 0.5047  | 2.1824  |
| H(18) | 3.9775  | -0.5813 | -2.1234 |
| H(19) | 4.0715  | 1.2628  | 1.7620  |
| H(20) | 5.1851  | 0.7251  | -0.3915 |
| H(21) | -0.7085 | -0.2386 | -1.4393 |
| H(22) | -5.0210 | 1.4164  | -0.5907 |
| H(23) | -4.7331 | 0.5131  | 0.9390  |
| H(24) | -4.9925 | -0.3817 | -0.5902 |
| N(25) | -0.6951 | 1.6135  | -0.2524 |
| N(26) | -0.4075 | 2.6693  | -0.1065 |

### C<sup>OH</sup>

total electronic energy  $E_{\text{tot}} = -613.091518430$  (Hartree/Particle)  
Zero-point correction= 0.192966  
Thermal correction to Energy= 0.205499  
Thermal correction to Enthalpy= 0.206444  
Thermal correction to Gibbs Free Energy= 0.152816  
Sum of electronic and zero-point Energies= -612.898552  
Sum of electronic and thermal Energies= -612.886019



Sum of electronic and thermal Enthalpies= -612.885075  
Sum of electronic and thermal Free Energies= -612.938703

|       |         |         |         |
|-------|---------|---------|---------|
| O(1)  | 1.9864  | -2.2369 | 0.5291  |
| C(2)  | 0.0546  | -1.1719 | -0.2394 |
| C(3)  | -1.1771 | -0.5493 | -0.0736 |
| C(4)  | -1.4456 | 0.3955  | 0.9720  |
| C(5)  | -2.2213 | -0.8733 | -1.0036 |
| C(6)  | -2.6868 | 0.9866  | 1.0614  |
| C(7)  | -3.4616 | -0.2773 | -0.8972 |
| C(8)  | -3.6918 | 0.6492  | 0.1328  |
| C(9)  | 1.2955  | -1.0305 | 0.5594  |
| C(10) | 2.3765  | 2.4138  | -0.5405 |
| O(11) | 3.3491  | -0.1262 | -0.2997 |
| C(12) | 2.2007  | 0.1162  | -0.0242 |
| O(13) | 1.5721  | 1.2755  | -0.0976 |
| H(14) | 2.9076  | -2.0380 | 0.2744  |
| H(15) | 0.1558  | -1.8938 | -1.0501 |
| H(16) | -0.6715 | 0.6455  | 1.6878  |
| H(17) | -2.0201 | -1.5934 | -1.7910 |
| H(18) | -2.8990 | 1.7014  | 1.8487  |
| H(19) | -4.2531 | -0.5214 | -1.5969 |
| H(20) | -4.6701 | 1.1129  | 0.2212  |
| H(21) | 1.0743  | -0.7174 | 1.5924  |
| H(22) | 1.6838  | 3.2512  | -0.5788 |
| H(23) | 2.7984  | 2.2032  | -1.5237 |
| H(24) | 3.1751  | 2.5964  | 0.1793  |

## CC1

total electronic energy  $E_{\text{tot}} = -613.029853748$  (Hartree/Particle)  
Zero-point correction= 0.191327  
Thermal correction to Energy= 0.203693  
Thermal correction to Enthalpy= 0.204637  
Thermal correction to Gibbs Free Energy= 0.150513  
Sum of electronic and zero-point Energies= -612.838527  
Sum of electronic and thermal Energies= -612.826161  
Sum of electronic and thermal Enthalpies= -612.825216  
Sum of electronic and thermal Free Energies= -612.879340  
 $\nu = -200\text{cm}^{-1}$

|       |         |         |         |
|-------|---------|---------|---------|
| O(1)  | -0.2994 | -1.7305 | 1.3053  |
| C(2)  | -0.0760 | -0.4114 | 0.7581  |
| C(3)  | 1.3088  | -0.0623 | 0.2964  |
| C(4)  | 1.9856  | -0.8731 | -0.6392 |
| C(5)  | 1.9377  | 1.0856  | 0.8088  |
| C(6)  | 3.2819  | -0.5535 | -1.0275 |
| C(7)  | 3.2306  | 1.4047  | 0.4091  |
| C(8)  | 3.9025  | 0.5872  | -0.5075 |
| C(9)  | -1.0137 | -0.6049 | -0.3640 |
| C(10) | -4.0961 | 1.4838  | -0.2324 |
| O(11) | -3.2013 | -1.1541 | -0.3106 |
| C(12) | -2.4425 | -0.2061 | -0.3441 |
| O(13) | -2.6855 | 1.0769  | -0.2851 |
| H(14) | 0.3972  | -2.3342 | 0.9902  |
| H(15) | -0.4452 | 0.3050  | 1.4929  |
| H(16) | 1.5171  | -1.7614 | -1.0585 |
| H(17) | 1.4187  | 1.7125  | 1.5277  |
| H(18) | 3.8062  | -1.1847 | -1.7368 |
| H(19) | 3.7200  | 2.2839  | 0.8145  |
| H(20) | 4.9109  | 0.8406  | -0.8182 |
| H(21) | -0.7156 | -1.2644 | -1.1761 |
| H(22) | -4.0752 | 2.5655  | -0.3350 |
| H(23) | -4.5160 | 1.1826  | 0.7277  |
| H(24) | -4.6413 | 1.0155  | -1.0523 |

## CC2

total electronic energy  $E_{\text{tot}} = -613.068966855$  (Hartree/Particle)  
Zero-point correction= 0.191676  
Thermal correction to Energy= 0.204144  
Thermal correction to Enthalpy= 0.205088  
Thermal correction to Gibbs Free Energy= 0.151873  
Sum of electronic and zero-point Energies= -612.877291  
Sum of electronic and thermal Energies= -612.864823  
Sum of electronic and thermal Enthalpies= -612.863879  
Sum of electronic and thermal Free Energies= -612.917094  
 $\nu = -271\text{cm}^{-1}$

|       |         |         |         |
|-------|---------|---------|---------|
| O(1)  | -2.3714 | -2.2124 | -0.2230 |
| C(2)  | -0.4128 | -1.0910 | 0.3937  |
| C(3)  | 0.9240  | -0.5792 | 0.1752  |
| C(4)  | 1.4928  | -0.4326 | -1.1089 |
| C(5)  | 1.6925  | -0.2534 | 1.3137  |
| C(6)  | 2.7915  | 0.0374  | -1.2426 |
| C(7)  | 2.9930  | 0.2151  | 1.1718  |
| C(8)  | 3.5414  | 0.3635  | -0.1050 |
| C(9)  | -1.3861 | -1.3986 | -0.5696 |
| C(10) | -1.8269 | 2.6820  | -0.3618 |
| O(11) | -2.6957 | 0.3840  | 1.0490  |
| C(12) | -1.8107 | 0.4087  | 0.2626  |
| O(13) | -1.2757 | 1.3167  | -0.4939 |
| H(14) | -3.0633 | -2.2662 | -0.9007 |
| H(15) | -0.6639 | -1.4314 | 1.3975  |
| H(16) | 0.9344  | -0.7078 | -1.9979 |
| H(17) | 1.2638  | -0.3752 | 2.3045  |
| H(18) | 3.2308  | 0.1379  | -2.2292 |
| H(19) | 3.5805  | 0.4584  | 2.0505  |
| H(20) | 4.5595  | 0.7225  | -0.2169 |
| H(21) | -1.2745 | -1.1182 | -1.6159 |
| H(22) | -1.6331 | 3.0413  | 0.6488  |
| H(23) | -2.8968 | 2.6557  | -0.5686 |
| H(24) | -1.2878 | 3.2654  | -1.1034 |

### AB<sup>H2</sup>

total electronic energy  $E_{\text{tot}} = -722.563918281$  (Hartree/Particle)

|                                              |             |
|----------------------------------------------|-------------|
| Zero-point correction=                       | 0.201573    |
| Thermal correction to Energy=                | 0.215842    |
| Thermal correction to Enthalpy=              | 0.216786    |
| Thermal correction to Gibbs Free Energy=     | 0.158702    |
| Sum of electronic and zero-point Energies=   | -722.362346 |
| Sum of electronic and thermal Energies=      | -722.348077 |
| Sum of electronic and thermal Enthalpies=    | -722.347132 |
| Sum of electronic and thermal Free Energies= | -722.405217 |

$\nu = -221\text{cm}^{-1}$

|       |         |         |         |
|-------|---------|---------|---------|
| O(1)  | -0.3988 | -1.6104 | 1.0253  |
| C(2)  | 0.1921  | -1.2407 | -0.1111 |
| C(3)  | 1.5134  | -0.6271 | 0.0085  |
| C(4)  | 2.3467  | -0.5781 | -1.1258 |
| C(5)  | 1.9613  | -0.0989 | 1.2350  |
| C(6)  | 3.6159  | -0.0203 | -1.0299 |
| C(7)  | 3.2354  | 0.4549  | 1.3211  |
| C(8)  | 4.0597  | 0.4959  | 0.1931  |
| C(9)  | -1.0325 | 0.1492  | -0.9200 |
| C(10) | -4.4026 | 0.5679  | 0.6142  |
| O(11) | -2.7743 | -1.3672 | -0.4292 |
| C(12) | -2.4140 | -0.2091 | -0.4103 |
| O(13) | -3.0780 | 0.8334  | 0.0559  |
| N(14) | -0.5773 | 1.3805  | -0.5459 |
| N(15) | -0.0647 | 2.2797  | -0.1180 |
| H(16) | -1.2103 | -2.1127 | 0.8275  |
| H(17) | 0.0287  | -1.8942 | -0.9694 |
| H(18) | 2.0082  | -0.9975 | -2.0703 |
| H(19) | 1.3253  | -0.1570 | 2.1118  |
| H(20) | 4.2645  | 0.0037  | -1.8990 |
| H(21) | 3.5891  | 0.8484  | 2.2681  |
| H(22) | 5.0537  | 0.9254  | 0.2668  |
| H(23) | -0.8834 | -0.0059 | -1.9875 |
| H(24) | -4.7666 | 1.5388  | 0.9413  |
| H(25) | -4.3148 | -0.1248 | 1.4519  |
| H(26) | -5.0443 | 0.1452  | -0.1591 |

### AB<sup>H2</sup>

total electronic energy  $E_{\text{tot}} = -722.560435321$  (Hartree/Particle)

|                                              |             |
|----------------------------------------------|-------------|
| Zero-point correction=                       | 0.201248    |
| Thermal correction to Energy=                | 0.215733    |
| Thermal correction to Enthalpy=              | 0.216677    |
| Thermal correction to Gibbs Free Energy=     | 0.157930    |
| Sum of electronic and zero-point Energies=   | -722.359187 |
| Sum of electronic and thermal Energies=      | -722.344703 |
| Sum of electronic and thermal Enthalpies=    | -722.343759 |
| Sum of electronic and thermal Free Energies= | -722.402506 |

$\nu = -246\text{cm}^{-1}$

|       |         |         |         |
|-------|---------|---------|---------|
| O(1)  | 0.3277  | -0.8747 | 1.5014  |
| C(2)  | -0.1236 | 0.2156  | 0.8784  |
| C(3)  | -1.5239 | 0.2027  | 0.4863  |
| C(4)  | -2.1357 | 1.4166  | 0.1125  |
| C(5)  | -2.2679 | -0.9945 | 0.4861  |
| C(6)  | -3.4746 | 1.4312  | -0.2556 |
| C(7)  | -3.6078 | -0.9678 | 0.1161  |
| C(8)  | -4.2090 | 0.2392  | -0.2568 |
| C(9)  | 0.9699  | 0.2417  | -0.8780 |
| C(10) | 4.3278  | -0.0019 | 0.6756  |
| O(11) | 2.7260  | 1.8131  | -0.5823 |
| C(12) | 2.3420  | 0.6829  | -0.4330 |
| O(13) | 2.9684  | -0.3053 | 0.2295  |
| N(14) | 0.8596  | -1.0580 | -1.2494 |
| N(15) | 0.6904  | -2.1575 | -1.3929 |
| H(16) | 1.2464  | -0.7623 | 1.7974  |
| H(17) | 0.3055  | 1.1754  | 1.1704  |
| H(18) | -1.5641 | 2.3413  | 0.1234  |
| H(19) | -1.8024 | -1.9218 | 0.8012  |
| H(20) | -3.9506 | 2.3651  | -0.5341 |
| H(21) | -4.1887 | -1.8839 | 0.1256  |
| H(22) | -5.2562 | 0.2536  | -0.5416 |
| H(23) | 0.4652  | 0.9124  | -1.5674 |
| H(24) | 4.6804  | -0.9156 | 1.1487  |
| H(25) | 4.3095  | 0.8301  | 1.3806  |
| H(26) | 4.9439  | 0.2554  | -0.1863 |

### AB<sup>Ph1</sup>

total electronic energy  $E_{\text{tot}} = -722.559724832$  (Hartree/Particle)

Zero-point correction= 0.201161  
Thermal correction to Energy= 0.215623  
Thermal correction to Enthalpy= 0.216567  
Thermal correction to Gibbs Free Energy= 0.157960  
Sum of electronic and zero-point Energies= -722.358564  
Sum of electronic and thermal Energies= -722.344102  
Sum of electronic and thermal Enthalpies= -722.343158  
Sum of electronic and thermal Free Energies= -722.401765

$\nu = -209\text{cm}^{-1}$

|       |         |         |         |
|-------|---------|---------|---------|
| O(1)  | -0.3516 | -0.4190 | 1.8507  |
| C(2)  | 0.2972  | 0.4378  | 1.0725  |
| C(3)  | 1.5801  | 0.1069  | 0.4478  |
| C(4)  | 1.8909  | -1.1992 | 0.0209  |
| C(5)  | 2.5288  | 1.1368  | 0.3062  |
| C(6)  | 3.1445  | -1.4670 | -0.5158 |
| C(7)  | 3.7837  | 0.8573  | -0.2259 |
| C(8)  | 4.0915  | -0.4428 | -0.6353 |
| C(9)  | -0.9742 | 0.6536  | -0.5635 |
| N(10) | -1.5805 | 1.8721  | -0.4907 |
| N(11) | -2.0330 | 2.8815  | -0.3082 |
| C(12) | -4.1256 | -1.2524 | -0.0714 |
| O(13) | -1.4475 | -1.6557 | -0.4389 |
| C(14) | -1.9003 | -0.5326 | -0.4369 |
| O(15) | -3.1646 | -0.1735 | -0.2725 |
| H(16) | -0.1469 | -1.3417 | 1.6201  |
| H(17) | 0.1774  | 1.4556  | 1.4384  |
| H(18) | 1.1514  | -1.9938 | 0.0677  |
| H(19) | 2.2931  | 2.1441  | 0.6391  |
| H(20) | 3.3858  | -2.4716 | -0.8461 |
| H(21) | 4.5211  | 1.6477  | -0.3164 |
| H(22) | 5.0698  | -0.6600 | -1.0518 |
| H(23) | -0.2734 | 0.6170  | -1.3929 |
| H(24) | -5.0882 | -0.7559 | 0.0253  |
| H(25) | -3.8740 | -1.8027 | 0.8360  |
| H(26) | -4.1114 | -1.9205 | -0.9329 |

### AB<sup>Ph1</sup>

total electronic energy  $E_{\text{tot}} = -722.557211384$  (Hartree/Particle)

Zero-point correction= 0.200994  
Thermal correction to Energy= 0.215522  
Thermal correction to Enthalpy= 0.216466  
Thermal correction to Gibbs Free Energy= 0.157575  
Sum of electronic and zero-point Energies= -722.356218  
Sum of electronic and thermal Energies= -722.341689  
Sum of electronic and thermal Enthalpies= -722.340745

Sum of electronic and thermal Free Energies= -722.399637  
 $\nu = -231\text{cm}^{-1}$

|       |         |         |         |
|-------|---------|---------|---------|
| O(1)  | -0.4310 | -0.0293 | 1.8706  |
| C(2)  | 0.1983  | 0.7811  | 1.0129  |
| C(3)  | 1.4663  | 0.3027  | 0.4831  |
| C(4)  | 1.8025  | -1.0650 | 0.5126  |
| C(5)  | 2.3692  | 1.2430  | -0.0545 |
| C(6)  | 3.0347  | -1.4764 | 0.0191  |
| C(7)  | 3.5981  | 0.8208  | -0.5434 |
| C(8)  | 3.9292  | -0.5391 | -0.5085 |
| C(9)  | -1.0090 | 0.8034  | -0.6536 |
| N(10) | -1.9074 | 1.8154  | -0.5009 |
| N(11) | -2.6017 | 2.6628  | -0.2547 |
| C(12) | -3.4535 | -1.8858 | 0.0639  |
| O(13) | -1.0153 | -1.5236 | -1.1148 |
| C(14) | -1.6121 | -0.5849 | -0.6552 |
| O(15) | -2.7904 | -0.5905 | -0.0293 |
| H(16) | -1.1457 | 0.4196  | 2.3466  |
| H(17) | 0.1177  | 1.8527  | 1.2030  |
| H(18) | 1.1057  | -1.7858 | 0.9229  |
| H(19) | 2.1135  | 2.2998  | -0.0689 |
| H(20) | 3.3013  | -2.5275 | 0.0441  |
| H(21) | 4.3008  | 1.5434  | -0.9440 |
| H(22) | 4.8898  | -0.8682 | -0.8919 |
| H(23) | -0.3181 | 1.0135  | -1.4656 |
| H(24) | -4.4042 | -1.6827 | 0.5517  |
| H(25) | -2.8436 | -2.5681 | 0.6573  |
| H(26) | -3.6049 | -2.2944 | -0.9357 |

### **BF<sub>4</sub><sup>-</sup>-associated Pathway**

#### **A<sup>Z</sup>·MDA·BF<sub>4</sub><sup>-</sup>**

total electronic energy E<sub>tot</sub> = -1147.26030597 (Hartree/Particle)  
Zero-point correction= 0.215585  
Thermal correction to Energy= 0.236959  
Thermal correction to Enthalpy= 0.237903  
Thermal correction to Gibbs Free Energy= 0.160099  
Sum of electronic and zero-point Energies= -1147.044721  
Sum of electronic and thermal Energies= -1147.023347  
Sum of electronic and thermal Enthalpies= -1147.022403  
Sum of electronic and thermal Free Energies= -1147.100207

|       |         |         |         |
|-------|---------|---------|---------|
| O(1)  | 1.5694  | -2.1601 | -0.5260 |
| C(2)  | 1.5480  | -0.9299 | -0.2386 |
| C(3)  | 2.7692  | -0.1852 | -0.0913 |
| C(4)  | 4.0306  | -0.8083 | -0.2136 |
| C(5)  | 2.6767  | 1.1945  | 0.1858  |
| C(6)  | 5.1829  | -0.0545 | -0.0570 |
| C(7)  | 3.8419  | 1.9396  | 0.3388  |
| C(8)  | 5.0869  | 1.3174  | 0.2192  |
| H(9)  | 0.5858  | -2.6181 | -0.6028 |
| H(10) | 0.5872  | -0.4267 | -0.0934 |
| H(11) | 4.0787  | -1.8710 | -0.4251 |
| H(12) | 1.6957  | 1.6535  | 0.2638  |
| H(13) | 6.1576  | -0.5229 | -0.1462 |
| H(14) | 3.7837  | 3.0021  | 0.5510  |
| H(15) | 5.9938  | 1.9024  | 0.3414  |
| C(16) | -2.7467 | 0.8660  | -0.0956 |
| C(17) | -1.1511 | 4.1474  | -0.0032 |
| O(18) | -0.4917 | 1.5704  | -0.1079 |
| C(19) | -1.6865 | 1.8456  | -0.0739 |
| O(20) | -2.1495 | 3.1195  | -0.0187 |
| N(21) | -3.9951 | 1.2639  | -0.0927 |
| N(22) | -5.0803 | 1.5989  | -0.0901 |
| H(23) | -2.5686 | -0.2027 | -0.1168 |
| H(24) | -1.7012 | 5.0881  | 0.0055  |
| H(25) | -0.5158 | 4.0867  | -0.8906 |
| H(26) | -0.5259 | 4.0678  | 0.8902  |
| F(27) | -2.6650 | -2.2379 | -0.5283 |
| B(28) | -1.5967 | -2.6952 | 0.2200  |
| F(29) | -0.9626 | -1.6278 | 0.8767  |
| F(30) | -1.8996 | -3.7239 | 1.0574  |
| F(31) | -0.5613 | -3.1835 | -0.7612 |

#### **AB<sup>H</sup>**

total electronic energy E<sub>tot</sub> = -1147.24174298 (Hartree/Particle)

Zero-point correction= 0.217614  
Thermal correction to Energy= 0.237453  
Thermal correction to Enthalpy= 0.238397  
Thermal correction to Gibbs Free Energy= 0.166942  
Sum of electronic and zero-point Energies= -1147.024129  
Sum of electronic and thermal Energies= -1147.004290  
Sum of electronic and thermal Enthalpies= -1147.003346  
Sum of electronic and thermal Free Energies= -1147.074801  
**v = -194cm<sup>-1</sup>**

|       |         |         |         |
|-------|---------|---------|---------|
| O(1)  | 0.7677  | -1.5725 | 0.7658  |
| C(2)  | 0.0922  | -0.9575 | -0.1986 |
| C(3)  | -1.3760 | -1.1707 | -0.1693 |
| C(4)  | -2.0114 | -1.5963 | 1.0075  |
| C(5)  | -2.1302 | -0.9763 | -1.3365 |
| C(6)  | -3.3863 | -1.8140 | 1.0155  |
| C(7)  | -3.5063 | -1.1980 | -1.3228 |
| C(8)  | -4.1358 | -1.6132 | -0.1473 |
| H(9)  | 1.7453  | -1.6504 | 0.5132  |
| H(10) | 0.5639  | -0.9509 | -1.1830 |
| H(11) | -1.4178 | -1.7747 | 1.8973  |
| H(12) | -1.6399 | -0.6516 | -2.2488 |
| H(13) | -3.8739 | -2.1495 | 1.9256  |
| H(14) | -4.0838 | -1.0555 | -2.2308 |
| H(15) | -5.2071 | -1.7903 | -0.1393 |
| C(16) | 0.3934  | 0.9419  | 0.0315  |
| C(17) | -2.7069 | 2.9420  | 0.1633  |
| O(18) | -0.9533 | 1.9639  | -1.6314 |
| C(19) | -0.7549 | 1.7741  | -0.4555 |
| O(20) | -1.5278 | 2.2032  | 0.5548  |
| N(21) | 0.6396  | 1.0367  | 1.3727  |
| N(22) | 0.8273  | 0.8937  | 2.4639  |
| H(23) | 1.3317  | 1.0358  | -0.5292 |
| H(24) | -3.1782 | 3.2474  | 1.0959  |
| H(25) | -3.3721 | 2.2983  | -0.4153 |
| H(26) | -2.4273 | 3.8112  | -0.4345 |
| F(27) | 3.1544  | 0.4962  | 0.7626  |
| B(28) | 3.5207  | -0.2827 | -0.3531 |
| F(29) | 2.7057  | 0.1247  | -1.4468 |
| F(30) | 4.8458  | -0.2169 | -0.6423 |
| F(31) | 3.1306  | -1.6504 | -0.0493 |

## B<sup>H</sup>

total electronic energy E<sub>tot</sub> = -1147.24320338 (Hartree/Particle)  
Zero-point correction= 0.218545  
Thermal correction to Energy= 0.238748  
Thermal correction to Enthalpy= 0.239692  
Thermal correction to Gibbs Free Energy= 0.167014  
Sum of electronic and zero-point Energies= -1147.024659  
Sum of electronic and thermal Energies= -1147.004456  
Sum of electronic and thermal Enthalpies= -1147.003511  
Sum of electronic and thermal Free Energies= -1147.076190

|       |         |         |         |
|-------|---------|---------|---------|
| O(1)  | 0.6417  | -1.8198 | 0.1241  |
| C(2)  | -0.0686 | -0.8519 | -0.5314 |
| C(3)  | -1.5545 | -1.0640 | -0.3673 |
| C(4)  | -2.0463 | -1.7556 | 0.7480  |
| C(5)  | -2.4520 | -0.5822 | -1.3300 |
| C(6)  | -3.4186 | -1.9443 | 0.9058  |
| C(7)  | -3.8243 | -0.7741 | -1.1688 |
| C(8)  | -4.3103 | -1.4505 | -0.0487 |
| H(9)  | 1.5882  | -1.8225 | -0.1821 |
| H(10) | 0.2096  | -0.7204 | -1.5850 |
| H(11) | -1.3473 | -2.1706 | 1.4656  |
| H(12) | -2.0769 | -0.0613 | -2.2056 |
| H(13) | -3.7911 | -2.4878 | 1.7689  |
| H(14) | -4.5112 | -0.4063 | -1.9250 |
| H(15) | -5.3783 | -1.6045 | 0.0731  |
| C(16) | 0.3853  | 0.6479  | 0.0524  |
| C(17) | -2.0959 | 3.3920  | 0.4146  |
| O(18) | -0.6859 | 2.0989  | -1.4940 |
| C(19) | -0.5464 | 1.7841  | -0.3394 |
| O(20) | -1.1596 | 2.3281  | 0.7167  |
| N(21) | 0.4993  | 0.5100  | 1.4477  |
| N(22) | 0.5682  | 0.2422  | 2.5215  |
| H(23) | 1.4166  | 0.8271  | -0.3330 |

|       |         |         |         |
|-------|---------|---------|---------|
| H(24) | -2.4583 | 3.7375  | 1.3808  |
| H(25) | -2.9143 | 2.9999  | -0.1915 |
| H(26) | -1.5895 | 4.1947  | -0.1237 |
| F(27) | 2.9895  | -0.1245 | 1.0402  |
| B(28) | 3.5339  | -0.3134 | -0.2516 |
| F(29) | 2.9359  | 0.6788  | -1.0946 |
| F(30) | 4.8905  | -0.2413 | -0.2693 |
| F(31) | 3.0652  | -1.5852 | -0.7267 |

### BC<sup>H</sup>

total electronic energy E<sub>tot</sub> = -1147.22467143 (Hartree/Particle)  
 Zero-point correction= 0.214400  
 Thermal correction to Energy= 0.235412  
 Thermal correction to Enthalpy= 0.236356  
 Thermal correction to Gibbs Free Energy= 0.161000  
 Sum of electronic and zero-point Energies= -1147.010271  
 Sum of electronic and thermal Energies= -1146.989260  
 Sum of electronic and thermal Enthalpies= -1146.988315  
 Sum of electronic and thermal Free Energies= -1147.063671  
**v = -150cm<sup>-1</sup>**

|       |         |         |         |
|-------|---------|---------|---------|
| O(1)  | 0.4573  | -1.8305 | -0.6375 |
| C(2)  | -0.3044 | -0.7116 | -0.8768 |
| C(3)  | -1.7584 | -0.9471 | -0.4923 |
| C(4)  | -2.0521 | -1.8660 | 0.5210  |
| C(5)  | -2.7981 | -0.2631 | -1.1336 |
| C(6)  | -3.3761 | -2.0773 | 0.9054  |
| C(7)  | -4.1208 | -0.4783 | -0.7442 |
| C(8)  | -4.4116 | -1.3822 | 0.2782  |
| C(9)  | 0.2974  | 0.5677  | -0.4066 |
| C(10) | -1.5495 | 3.5916  | 0.7249  |
| O(11) | -0.7151 | 2.2995  | -1.5180 |
| C(12) | -0.4901 | 1.8364  | -0.4190 |
| O(13) | -0.8263 | 2.3308  | 0.7565  |
| N(14) | 0.6216  | 0.0965  | 1.6217  |
| N(15) | 0.9306  | -0.0935 | 2.6632  |
| H(16) | 1.4113  | -1.6469 | -0.8500 |
| H(17) | -0.2852 | -0.3965 | -1.9622 |
| H(18) | -1.2441 | -2.4211 | 0.9830  |
| H(19) | -2.5811 | 0.4277  | -1.9429 |
| H(20) | -3.5982 | -2.7926 | 1.6914  |
| H(21) | -4.9227 | 0.0491  | -1.2518 |
| H(22) | -5.4416 | -1.5542 | 0.5758  |
| H(23) | 1.3938  | 0.7006  | -0.4935 |
| H(24) | -1.6720 | 3.8719  | 1.7686  |
| H(25) | -2.5175 | 3.4470  | 0.2427  |
| H(26) | -0.9694 | 4.3391  | 0.1822  |
| F(27) | 3.1202  | -1.1207 | 0.9604  |
| B(28) | 3.5141  | -0.4040 | -0.1642 |
| F(29) | 3.0408  | 0.9446  | -0.0307 |
| F(30) | 4.8507  | -0.4427 | -0.4152 |
| F(31) | 2.7711  | -0.9417 | -1.2997 |

### C<sup>H</sup>

total electronic energy E<sub>tot</sub> = -1037.80643559 (Hartree/Particle)  
 Zero-point correction= 0.207456  
 Thermal correction to Energy= 0.225894  
 Thermal correction to Enthalpy= 0.226838  
 Thermal correction to Gibbs Free Energy= 0.155413  
 Sum of electronic and zero-point Energies= -1037.598980  
 Sum of electronic and thermal Energies= -1037.580542  
 Sum of electronic and thermal Enthalpies= -1037.579598  
 Sum of electronic and thermal Free Energies= -1037.651023

|       |         |         |         |
|-------|---------|---------|---------|
| O(1)  | 0.2443  | -0.8640 | -0.8930 |
| C(2)  | -0.4797 | -0.3040 | -0.0418 |
| C(3)  | -1.9100 | -0.6340 | -0.0063 |
| C(4)  | -2.8191 | 0.1136  | 0.7672  |
| C(5)  | -2.3765 | -1.7179 | -0.7766 |
| C(6)  | -4.1701 | -0.2205 | 0.7636  |
| C(7)  | -3.7238 | -2.0532 | -0.7622 |
| C(8)  | -4.6212 | -1.3047 | 0.0073  |
| C(9)  | 0.1052  | 0.7047  | 0.9238  |
| C(10) | 0.5058  | 3.6617  | -1.2749 |
| O(11) | -0.8041 | 2.9583  | 0.9566  |

|       |         |         |         |
|-------|---------|---------|---------|
| C(12) | -0.1012 | 2.1342  | 0.4168  |
| O(13) | 0.5996  | 2.3380  | -0.7072 |
| H(14) | 1.4701  | -0.6188 | -0.9139 |
| H(15) | 1.1764  | 0.5156  | 1.0361  |
| H(16) | -2.4823 | 0.9699  | 1.3414  |
| H(17) | -1.6661 | -2.2850 | -1.3673 |
| H(18) | -4.8706 | 0.3631  | 1.3519  |
| H(19) | -4.0788 | -2.8953 | -1.3474 |
| H(20) | -5.6747 | -1.5681 | 0.0164  |
| H(21) | -0.3757 | 0.6291  | 1.8979  |
| H(22) | 1.1163  | 3.6335  | -2.1758 |
| H(23) | 0.8913  | 4.4012  | -0.5702 |
| H(24) | -0.5327 | 3.8996  | -1.5145 |
| F(25) | 4.5988  | -1.1979 | -0.1190 |
| B(26) | 3.3130  | -1.1739 | 0.2856  |
| F(27) | 3.0501  | -0.3606 | 1.3645  |
| F(28) | 2.5437  | -0.3964 | -0.9221 |
| F(29) | 2.6615  | -2.3689 | 0.3284  |
